# Supplementary material
Source: PubMed Central journal article supplement (PMC4299210)
Supplement: pnas.201408071SI.pdf [file pnas.201408071SI.pdf]

# Supporting Information

Rollins et al. 10.1073/pnas.1408071112

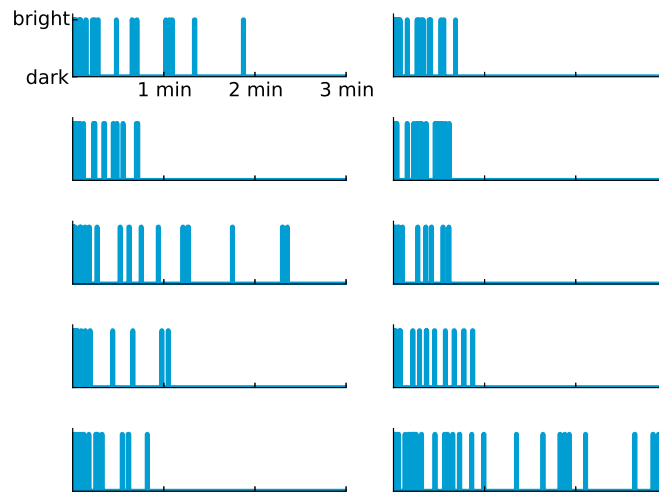

Fig. S1. Simulated time traces for a collection of PA-FPs. Sample traces from Gillespie simulations with parameters:  $N=5$  and rates from data set 1.

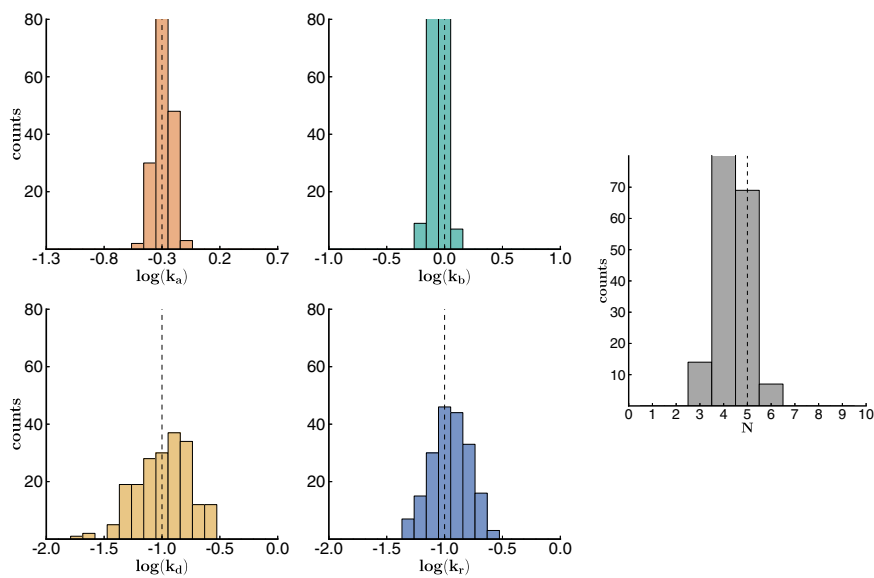

Fig. S2. Histogram of bootstrapping results from simulated data set 3. Histogram of bootstrapping results from simulated data set 3 with 200 traces (200 bootstrap iterations). The theoretically expected results are shown in the dotted line.



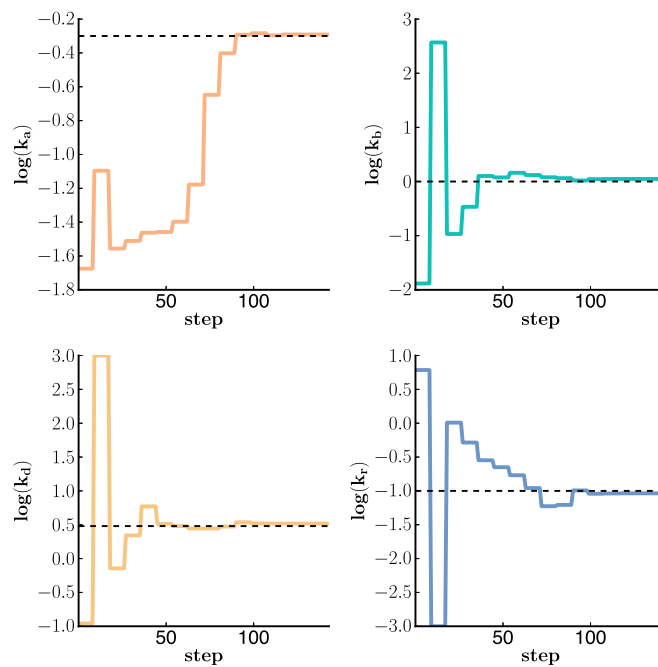

**Fig. S6.** Convergence of likelihood maximization of data set 1. The maximization converges close to true the parameter values. The parameters are estimated from the results of many independent maximization runs, like the one depicted here. In these runs,  $N=5$ . Similar plots can be generated for the other data sets.

**Table S1.** Macrostates for a collection with  $N = 2$  PA-FPs

| Macrostate | $\{I,A,D,B\}$ | Aggregated class |
|------------|---------------|------------------|
| $s_1$      | $\{2,0,0,0\}$ | Dark             |
| $s_2$      | $\{0,0,2,0\}$ | Dark             |
| $s_3$      | $\{0,0,0,2\}$ | Dark             |
| $s_4$      | $\{1,0,1,0\}$ | Dark             |
| $s_5$      | $\{1,0,0,1\}$ | Dark             |
| $s_6$      | $\{0,0,1,1\}$ | Dark             |
| $s_7$      | $\{0,2,0,0\}$ | Bright           |
| $s_8$      | $\{1,1,0,0\}$ | Bright           |
| $s_9$      | $\{0,1,1,0\}$ | Bright           |
| $s_{10}$   | $\{0,1,0,1\}$ | Bright           |

Macrostates for a collection with  $N=2$  PA-FPs.

**Table S2.** Kinetic rates of a collection of PA-FPs

| Transition type | Change in population | Rate $s_i \rightarrow s_j$ |
|-----------------|----------------------|----------------------------|
| Activate        | $\{-1, +1, 0, 0\}$   | $N_{i,i}k_a(t)$            |
| Blink           | $\{0, -1, +1, 0\}$   | $N_{A,i}k_d$               |
| Recover         | $\{0, +1, -1, 0\}$   | $N_{D,i}k_r$               |
| Photobleach     | $\{0, -1, 0, +1\}$   | $N_{A,i}k_b$               |

Kinetic rates of a collection of PA-FPs.
